# Supplementary material for: Expression Patterns, Molecular Characterization, and Response to Host Stress of CYP Genes from Phenacoccus solenopsis (Hemiptera: Pseudococcidae)
Source: MDPI journal article supplement (doi:10.3390/insects10090264), 2019-08-22
Supplement: s1 [file s1]

Suppl. 4

A. Nucleotide and deduced amino acid sequences of PsCYP301B1 from *P. solenopsis*

|      |                                                                 |
|------|-----------------------------------------------------------------|
| 1    | ATGCTCAAATTAATTACTGCCGTTAAAAAAAAGCAAATATCTCAATGTAGAAATCGTTTC    |
| 1    | M L K L I T A V K K K Q I S Q C R N R F                         |
| 61   | ACACTTTCGATGAACGGATCACCCCAGATCATTTGTGGGCCTTCGATACTGAGCAATGAG    |
| 21   | T L S M N G S P Q I I C G P S I L S N E                         |
| 121  | ATACGACCATATGAAACAATACCTGGACCAAAGCCTATACCGTTGTTGGGGAACAGCTGG    |
| 41   | I R P Y E T I P G P K P I P L L G N S W                         |
| 181  | AGATTTTTTACCGTTCATAGGTCAATACAAATTAGAAGAAATAGATTTGCTTTCCAAAGCA   |
| 61   | R F L P F I G Q Y K L E E I D L L S K A                         |
| 241  | CTTCATGAACAATTTGGTGATATCGTGAAGATAGAAGGAATATTGGGACGGCCGGATATG    |
| 81   | L H E Q F G D I V K I E G I L G R P D M                         |
| 301  | GTGTTTCCTGTACGATGCGGATGAAATTGAAAAAATTTTTTCGTAATGAAGACGTTTTTGCCA |
| 101  | V F L Y D A D E I E K I F R N E D V L P                         |
| 361  | TTGAGACCATCTATGCCATCTCTTAGTTACTACAAACATACACTTCGGAAAGGTTTTTTTT   |
| 121  | L R P S M P S L S Y Y K H T L R K G F F                         |
| 421  | GGAGATATCAGCGGAGTGATCGCAGTGCATGGACCTAAATGGTTGGAATTTTCGTTCAAAA   |
| 141  | G D I S G V I A V H G P K W L E F R S K                         |
| 481  | GTGCAACAACCAGTTCTGCAACCACGTATTGTTAAACTGTATGTACGTGATATTGAAGAG    |
| 161  | V Q Q P V L Q P R I V K L Y V R D I E E                         |
| 541  | ATCGCCAATGCCTTCATTTCTAGAATTAAAAGGCGTCGAAGTATTAATGACGAAGTTGGT    |
| 181  | I A N A F I S R I K R R R S I N D E V G                         |
| 601  | GCAGATTTTTTTGAACGATATTCATCTTTGGTCTTTAGAAAGTATTGGGAAAATAGCGTTA   |
| 201  | A D F L N D I H L W S L E S I G K I A L                         |
| 661  | GATGTACGATTTGGTTGCCTGGACAACGTGATTGCGAATGAAGACACGCAATTATTTATT    |
| 221  | D V R F G C L D N V I A N E D T Q L F I                         |
| 721  | GATGCGGTGAATACATTTTTTCAAGAATGTTGGCGTATTAGAATTGAAAATACCATTTTGG   |
| 241  | D A V N T F F K N V G V L E L K I P F W                         |
| 781  | AAAGTTTTTCAACACCCCCTACTTGGAAGAAATATGTTTCATTCCTTAGACACCATTACCAGC |
| 261  | K V F N T P T W K K Y V H S L D T I T S                         |
| 841  | ATCACCATGAAGTACGTAGCAGAAGCGCAAAATTCATCATACAATAGTTGCTCATCATTT    |
| 281  | I T M K Y V A E A Q N S S Y N S C S S F                         |
| 901  | TTAACAAGAGTAATTCTTCACTTCTTCAACGAGTCCTTGCCTTAGATCCGAGCAATCCG     |
| 301  | L T K S N S S L L Q R V L A L D P S N P                         |
| 961  | AAATTGGCCGCAGTTCTAGCATTGGATATGTTTCTAGTTGGAATTGATACGACGTCGGCT    |
| 321  | K L A A V L A L D M F L V G I D T T S A                         |
| 1021 | GCGGTGGCATCAGTTTTTATATCAACTGAGTCAAAATCCAGACAAACAGCAAATATTATAT   |
| 341  | A V A S V L Y Q L S Q N P D K Q Q I L Y                         |
| 1081 | GATGAAATAAATAGAGTTTTTACCGAAATTGGATGACGAATTAACCATGGAAAAAATCGAC   |
| 361  | D E I N R V L P K L D D E L T M E K I D                         |
| 1141 | AACTTGTTTACTTAAAAGCATTTATAAAAGAACTTTGAGATTACATCCTGTAGTGCTA      |
| 381  | K L V Y L K A F I K E T L R L H P V V L                         |
| 1201 | GGTAATGGAAGAACATTGACTAAAGAAACAGAAATTTGTGGTTTTTAAAGTTCCTAAAGGA   |
| 401  | G N G R T L T K E T E I C G F K V P K G                         |
| 1261 | GTTCAAGTTGTATTTCAACATTTTGTATGAGTAACTCTGAACGTTATTTCAAATGCGCC     |
| 421  | V Q V V F Q H F V M S N S E R Y F K C A                         |
| 1321 | AACAATTTTCGAGCCAGAAAGATGGTTGAAAAACAATTTAGAAAAACCACATCCGTTTCGTA  |
| 441  | N N F E P E R W L K N N L E K P H P F V                         |
| 1381 | TCATTACCTTTTTGGCTTTTGAAAACGCATGTGCTTGGGAAGAAGATTTCGCAGAACTTGAG  |
| 461  | S L P F G F G K R M C L G R R F A E L E                         |
| 1441 | ATACAAGTCCTCATAACCAAGATGGTACAAAATTTCTGCGTCGACTTCAGACACAAAAAA    |
| 481  | I Q V L I T K M V Q N F C V D F R H K K                         |
| 1501 | CTCGAATATAGCGTCCAGCCGATGTACTTGCCCAAAGGAGATTTAACCTTTACATTTAGG    |
| 501  | L E Y S V Q P M Y L P K G D L T F T F R                         |
| 1561 | AATCGCGAGAAAAATAAAAATCAATGA                                     |
| 521  | N R E K N K N Q *                                               |

**B. Nucleotide and deduced amino acid sequences of PsCYP302A1 from *P. solenopsis***

|      |                                                                 |
|------|-----------------------------------------------------------------|
| 1    | ATGACTTTTTCGATGTGGAAAAGTACGTAATTTTTTCCACCGAACTGTCCCCAAAACCTTTT  |
| 1    | M T F R C G K V R N F S T E L S P K P F                         |
| 61   | AATGAGATAACCAGGGCCAAAATCGTTGCCTATAATCGGAACTTTGTGGCAGTACTTGCCG   |
| 21   | N E I P G P K S L P I I G T L W Q Y L P                         |
| 121  | CTGATTGGAAAATATAAATTCGATAGACTACACTGGAATGGGTACTGAAACTGAAAGAA     |
| 41   | L I G K Y K F D R L H W N G L L K L K E                         |
| 181  | TTCGGTCCTCTAGTCCGAGAAGAAATGATTCCCGGTCTACCAGTGGTATGGGTGTTCAAA    |
| 61   | F G P L V R E E M I P G L P V V W V F K                         |
| 241  | CCAGAAGACATCGAAACGGTATACCGAAACGAGGGGAGATACCCAGAACGTCGAAGTCAC    |
| 81   | P E D I E T V Y R N E G R Y P E R R S H                         |
| 301  | CTTGCTTTTACAAAATATCGTCTCGATAGACCGGACGTATATAATTCCGGAGGGTCTTCTT   |
| 101  | L A L Q K Y R L D R P D V Y N S G G L L                         |
| 361  | CCAACCAACGGTCCGGAATGGTGGCGTTTACGGAGGATATTTCAAAAAGATTTAAATAAA    |
| 121  | P T N G P E W W R L R R I F Q K D L N K                         |
| 421  | ATTCAAAACGTTTCGCTTATACTTGTTCGAAATCGGACGAAATTATCAAGAATTTTTTTACAA |
| 141  | I Q N V R L Y L S K S D E I I K N F L Q                         |
| 481  | CGCAGAATTCCCAAATACGAAAACGATTTTCGCGCCAGAATTATCGCGATTATATTTAGAA   |
| 161  | R R I P K Y E N D F A P E L S R L Y L E                         |
| 541  | CTGACTGGTTTtagtGGCGTTCGACGAACATTTGGGTAGTTTTAGCGATACGCAAATGGCC   |
| 181  | L T G L V A F D E H L G S F S D T Q M A                         |
| 601  | CCTAGTTCTCCAATGTCAAGGTTGATTGATTCAACGGCTTTTATAAATAGCTGCGTATTA    |
| 201  | P S S P M S R L I D S T A F I N S C V L                         |
| 661  | CGTACCGATAACGGTCCTCAGCTGTGGAGGAAATTTAACACACCGTTGTATAAAAAATTT    |
| 221  | R T D N G P Q L W R K F N T P L Y K K F                         |
| 721  | TGCGAAGCTCATTtATGCTTGGAAACAGTTGCCAAACATTTTGTATACAAGAAAATGCGC    |
| 241  | C E A H L C L E T V A K H F V Y K K M R                         |
| 781  | AAGCTTACAGAGGAACGTGGCAATCATCAATATTCTTTGTtagAGCAATATCTACTCAAC    |
| 261  | K L T E E R G N H Q Y S L L E Q Y L L N                         |
| 841  | AAAGAGCTCGATACTAAAGATGTGATCGGAATGGCAGCGGATATGTTATTGGCTGGCATT    |
| 281  | K E L D T K D V I G M A A D M L L A G I                         |
| 901  | GATACCACCGCCTATACGAGTTGTTTCGGATTGTATCATATTTCCAAAAATGTTGACAAA    |
| 301  | D T T A Y T S C F G L Y H I S K N V D K                         |
| 961  | CAAGAAAAAATGTTCAAAGAGCTGGAATCGTTGATGAACGCAGAATCCACGATAACCGAG    |
| 321  | Q E K M F K E L E S L M N A E S T I T E                         |
| 1021 | GAAATCCTAAACCAGGCAGTCTATACGAAAGCAGTTATGAAAGAGATATTCAGGATGAAT    |
| 341  | E I L N Q A V Y T K A V M K E I F R M N                         |
| 1081 | CCGATATCTGTAGGCATTGGTAGAATTTTAGCCAAAGATGCTGTGTTATCTGGGTATCTA    |
| 361  | P I S V G I G R I L A K D A V L S G Y L                         |
| 1141 | GTGCCAGCGAAGACCATtGTTGTAActCAAAACCAAGTGAActTGCCGATTACCAGAATAT   |
| 381  | V P A K T I V V T Q N Q V T C R L P E Y                         |
| 1201 | TTTCATAAACCGAACGAATTTATTCCGGAAAGATGGATCAAAGATCATGCACTTTATGAA    |
| 401  | F H K P N E F I P E R W I K D H A L Y E                         |
| 1261 | AACGTCCATCCTTATTTAGTTCTACCATTTGGTCAcGGTCCAAGAACTTGTATAGCTAGG    |
| 421  | N V H P Y L V L P F G H G P R T C I A R                         |
| 1321 | AGATTGGCTGAACAACATTTTTCAGTTGTTTTTTGATGAATGTGATTAGACGATACAGAATT  |
| 441  | R L A E Q H F Q L F L M N V I R R Y R I                         |
| 1381 | ACTTGGAAAGGAGATCATTTAGATTGTAAATCATTACAGATCAATAAGCCGGATAAAAGC    |
| 461  | T W K G D H L D C K S L Q I N K P D K S                         |
| 1441 | GTCGATATTGTTTTTTGAAAAACGATACTGA                                 |
| 481  | V D I V F E K R Y *                                             |

| C.Nucleotide and deduced amino acid sequences of PsCYP353F1 from <i>P. solenopsis</i> |                                                                     |
|---------------------------------------------------------------------------------------|---------------------------------------------------------------------|
| 1                                                                                     | <u>ATG</u> AACTACTAAGAAATCTGGGTAAAGATGTGCGACCATTTCGTGAAATACCTTCTCCA |
| 1                                                                                     | M K L L R N L G K D V R P F R E I P S P                             |
| 61                                                                                    | AAAGCATATCCGATCATCGGACATGCATATTTATTTTCCGGCAAAGGTCCTATCACAAA         |
| 21                                                                                    | K A Y P I I G H A Y L F S G K G P Y H K                             |
| 121                                                                                   | GATAAATTAACGGAAGCAGCTTACGATCTCAGTAAAAAATACGGTCCTGTTTTCTATCTC        |
| 41                                                                                    | D K L T E A A Y D L S K K Y G P V F Y L                             |
| 181                                                                                   | AAATTTCCCGGTCAAAGTTTTGTCATTACTACCGATGCGGAGAATGCTTCAAAAATATTC        |
| 61                                                                                    | K F P G Q S F V I T T D A E N A S K I F                             |
| 241                                                                                   | CAAATGAAGGAAAACCTTCCTAATCGCGTTACATTACCGGCTTTAGCATTATACCATGAA        |
| 81                                                                                    | Q N E G K L P N R V T L P A L A L Y H E                             |
| 301                                                                                   | AGATCTTTTGGTGCCGTTGGAGTAGTTCCAGACAACGGGCCAAACTGGTATAAATTGAGG        |
| 101                                                                                   | R S F G A V G V V P D N G P N W Y K L R                             |
| 361                                                                                   | AAAGCCTTATCGCCGTTGTTGATGAAAACCTACATTTCTAAATTTATCAATGAGAATCAA        |
| 121                                                                                   | K A L S P L L M K T Y I S K F I N E N Q                             |
| 421                                                                                   | CTCATCGCCGATAAATTTGTCTGAATATATTAGAAAAACAAGGATAAAAATAACACACTA        |
| 141                                                                                   | L I A D K F V E Y I R K N K D K N N T L                             |
| 481                                                                                   | ATCGATCTATGTTTCGCATATGTATCGGTATTCCATTGAATGTATGTCAATCGTGTGCCCA       |
| 161                                                                                   | I D L C S H M Y R Y S I E C M S I V C P                             |
| 541                                                                                   | GGAAGACGTCTTACCAATGAAGAAGATCTACGTAAAATCATCGAAGGTAGTTGTACATTC        |
| 181                                                                                   | G R R L T N E E D L R K I I E G S C T F                             |
| 601                                                                                   | ATGGATGGACTCTATCGTACTTATTCGGAGCCTCCTGTGTGGAAATTTATCAAACTAAA         |
| 201                                                                                   | M D G L Y R T Y S E P P V W K F I K T K                             |
| 661                                                                                   | GGATACAGAAAATTGGAACGAGGGCATAATATAATCAATAGATTCATGTACAAAGAAATG        |
| 221                                                                                   | G Y R K L E R G H N I I N R F M Y K E M                             |
| 721                                                                                   | GAGAAGCCAATCAATACGTGGAACGATTCCTTTATGAAAGTTCTATTTCAAGATTCTGAT        |
| 241                                                                                   | E K P I N T W N D S F M K V L F Q D S D                             |
| 781                                                                                   | TTAACTCGAAACCAAGCTCGTGTTTTATCCACTGAAGTATTTTTTATCAGGAATTGATTG        |
| 261                                                                                   | L T R N Q A R V L S T E V F L S G I D S                             |
| 841                                                                                   | ATATCCACCGCTATCACCATGACTTTGTATTATCTTTCCAAAAATGAAAAATGTCAACAT        |
| 281                                                                                   | I S T A I T M T L Y Y L S K N E K C Q H                             |
| 901                                                                                   | GAAGCTCTAAATGATGTGAAAAATGGCTCTCTGTCATACTTAAGAGCCTGTTTCAAAGAA        |
| 301                                                                                   | E A L N D V K N G S L S Y L R A C F K E                             |
| 961                                                                                   | ACATTAAGATTATCAGCAACTGCTGGCGGTACCACTAGAGCACTTCCTGCTGATGTAGTT        |
| 321                                                                                   | T L R L S A T A G G T T R A L P A D V V                             |
| 1021                                                                                  | ATGAATGATTACAACATTCCTGCAAATACTTACATTACCGCTTTCCATTCTGCAATGTCA        |
| 341                                                                                   | M N D Y N I P A N T Y I T A F H S A M S                             |
| 1081                                                                                  | CTTATGGATGAGTATTTTGAAGATGCTGATCTTTATAAACCAGAAAGGTGGTTGCATTG         |
| 361                                                                                   | L M D E Y F E D A D L Y K P E R W L H S                             |
| 1141                                                                                  | GAGAAGGTGCAAAGAAAAACGAATTCAGTAATTTTGCCTCTTTACCTTTTCGGACATGGA        |
| 381                                                                                   | E K V Q K K N E F S N F A S L P F G H G                             |
| 1201                                                                                  | CCGAGAATGTGCCCTGGGAGATGGTTATCTGAACAAGAAAGTGTAATCTTGTTGAGCGCT        |
| 401                                                                                   | P R M C P G R W L S E Q E S V I L L S A                             |
| 1261                                                                                  | ATATTAATAATCGTATAAATTAGAATCAGCGACGCCATCTCGAGTCGGTATGATATATAGA       |
| 421                                                                                   | I L K S Y K L E S A T P S R V G M I Y R                             |
| 1321                                                                                  | ATGAATCGTATTCAGAGCGTTCGATCGATATAAAGTTTATAGATAGATAA                  |
| 441                                                                                   | M N R I P E R S I D I K F I D R *                                   |

D. Nucleotide and deduced amino acid sequences of PsCYP3634A1 from P. solenopsis

|      |                                                                 |
|------|-----------------------------------------------------------------|
| 1    | ATGTCAAAAATACGTGATGAAATCATAACTTATTCGACATCGGTGAAAATTGGCCTACTA    |
| 1    | <u>M</u> S K I R D E I I T Y S T S V K I G L L                  |
| 61   | ACTATTCTAATTGTGTTATTATGGAAATATTTAATGAAATTATTCCGTCGTGATCATCGT    |
| 21   | T I L I V L L W K Y L M K L F R R D H R                         |
| 121  | TTGGTGACATTTGCTGAAACTCTACCCGGACCCCCAACGATACCTATAATAGGAAACGGT    |
| 41   | L V T F A E T L P G P P T I P I I G N G                         |
| 181  | TTAGATTTCTACTATGGAGGCGTCCATGCAATGAAGAAGGTAATGGGATATAACCGAAAAA   |
| 61   | L D F Y Y G G V H A M K K V M G Y T E K                         |
| 241  | TATGGCCATATATATAGGCTATGGTTCGGTAAATTTTTTAGTCGTTGGATTATCGAAAGTT   |
| 81   | Y G H I Y R L W F G K F L V V G L S K V                         |
| 301  | GAAGATTTAGAGGATGTATTTTATGAATTCAAAAACGATGGGAAAACCGGAAATATTTCGA   |
| 101  | E D L E D V F M N S K T M G K P E I F R                         |
| 361  | CCATTTTCAGGATTATTGGGGTGATGGATTGTTTACTGGTCCAATGCATATTTGGAAAAAA   |
| 121  | P F Q D Y W G D G L F T G P M H I W K K                         |
| 421  | AATAGAAAACGGTTTCAGCCCATTTTTTGGAATAATATAATGGGCTTATACACTCCAGAA    |
| 141  | N R K R F Q P I F G N N I M G L Y T P E                         |
| 481  | TTCAATGATAAAATTTATAAAGTCGTTGATATGATGAAAACGTTGTTGAATGGACCAGAA    |
| 161  | F N D K I Y K V V D M M K T L L N G P E                         |
| 541  | TTTGATGCTTGGGATTATTTACCTTATTTATCATTTGATATCATTACTAAAACCTCATTA    |
| 181  | F D A W D Y L P Y L S F D I I T K T S L                         |
| 601  | GATGTGGAATTAGATTGGAACGATAAATCTGTGTTACAGTTTCACAATTCTGTAAAAACG    |
| 201  | D V E L D W N D K S V L Q F H N S V K T                         |
| 661  | GGAATGGAACTAGTTTATTAAAAATGCTTCGGCCATGGTTACATATAAAATTCTTGAGA     |
| 221  | G M E T S L L K M L R P W L H I K F L R                         |
| 721  | GATTTATTATACAAAAACAAGTTGAAAAAGTCCAGGGTAGTATGTTAAAATTTTCGCAA     |
| 241  | D L L Y K K Q V E K V Q G S M L K F S Q                         |
| 781  | CAGACTATCCAAAATAAGTTGAATATAATTAAAGATGATATATTACGACGCAAAAATATA    |
| 261  | Q T I Q N K L N I I K D D I L R R K N I                         |
| 841  | ATTAATCAAGATCCAAATGAAGTGATATCATTTAAATCATTTTTTAACCACTGCTTATGAG   |
| 281  | I N Q D P N E V I S L K S F L T T A Y E                         |
| 901  | ATACAAGAGGAAGTAAATAATGAAAAACTTATGCACGATGAAATCATTACCATGATAACC    |
| 301  | I Q E E V N N E K L M H D E I I T M I T                         |
| 961  | GGGGGTACTGATAACCACAGCGATAACAAATTCGTTTTTTCCTACTGGCAGTTGCTATTTAT  |
| 321  | G G T D T T A I T N S F F L L A V A I Y                         |
| 1021 | CAAGATATACAGAGTAAATTATACGATGAAATGTATGAAGTTTTTCGGCGATAGTGATCGA   |
| 341  | Q D I Q S K L Y D E M Y E V F G D S D R                         |
| 1081 | TATGCTGACCACGACGATGTGAAACGATTACCATATTTAGACCAAGTGTTGAAGGAAACC    |
| 361  | Y A D H D D V K R L P Y L D Q V L K E T                         |
| 1141 | TTACGCAGATTTACTTTGGCTCCAGTCATTTTTCAGAGATGTAGAAGAAGATTGCAAAATA   |
| 381  | L R R F T L A P V I F R D V E E D C K I                         |
| 1201 | GGTGGTAGACTATTTCCGGCTGGTACCGCGTTAATGATTTCTATCATAGGCGTTCATTTT    |
| 401  | G G R L F P A G T A L M I S I I G V H F                         |
| 1261 | GATCCTGAATATTATCCAAATCCGTGGAAATTCGATCCAGAAAATTTTAGTCCTGAGGCT    |
| 421  | D P E Y Y P N P W K F D P E N F S P E A                         |
| 1321 | GTGGAGAAACGTCATAAATTGACATTTCTACCATTTAGCAGTGGTCCTCGCAATTGCATT    |
| 441  | V E K R H K L T F L P F S S G P R N C I                         |
| 1381 | GGTCAAAATTACGCCATGTTGGAAATGAAATTGACATTAATCGCTTTGCTGAGACATTTTC   |
| 461  | G Q N Y A M L E M K L T L I A L L R H F                         |
| 1441 | AGTTTTTCATACAACCTATGACAATGGACGATATAAAGATGAATATGGGATTTTTTAATGACC |
| 481  | S F H T T M T M D D I K M N M G F L M T                         |
| 1501 | AGCGTTGACGGGTATAAAATGAGCATTAAACCACGGAACAGAAAACCATCATATTTGTGA    |
| 501  | S V D G Y K M S I K P R N R K P S Y L *                         |

| E. Nucleotide and deduced amino acid sequences of PsCYP6PZ1 from <i>P. solenopsis</i> |                                                                     |
|---------------------------------------------------------------------------------------|---------------------------------------------------------------------|
| 1                                                                                     | <u>ATGTCTCAAATCTTCCTGCTACGAACATCATTGGCCGAAATATACAGGGATATCTACAAT</u> |
| 1                                                                                     | M S Q I F L L R T S L A E I Y R D I Y N                             |
| 61                                                                                    | AAGCTGGAACCTCATAAATTCGGAGGAATATTCGCAGTCAAGAAAAAGACCATAATAATA        |
| 21                                                                                    | K L E P H K F G G I F A V K K K T I I I                             |
| 121                                                                                   | AGAGATCCGGAATTAATTA AAAATGTGCTCATTAAAGACTTCGAGTACTTTTCATGATCGC      |
| 41                                                                                    | R D P E L I K N V L I K D F E Y F H D R                             |
| 181                                                                                   | GGCACCAAAGTCGATCAGGAAGTGGATCCGTTGGGATATCATT TTATTCAACATGAGAGGC      |
| 61                                                                                    | G T K V D Q E V D P L G Y H L F N M R G                             |
| 241                                                                                   | GAAGAATGGAAAAATCTAAGAATCAA ACTTACCAGCACTTTTACA ACTGGGAAAATGAAG      |
| 81                                                                                    | E E W K N L R I K L T S T F T T G K M K                             |
| 301                                                                                   | ATGATGTTTCCCTTGGTAAACGAATGCGGCAAAAAATTAAACACCGTGCTTGCTAACTTA        |
| 101                                                                                   | M M F P L V N E C G K K L N T V L A N L                             |
| 361                                                                                   | CCTGACAGCGAGGGATTTCGACATTAAAGATTTGGCAGCGAGATT CACAACCGACACAATT      |
| 121                                                                                   | P D S E G F D I K D L A A R F T T D T I                             |
| 421                                                                                   | GGCACTTGCGCTTTTGGCTTAGAAACCAATTCTTTGGATAATCCTGATT CAGAATTCAGA       |
| 141                                                                                   | G T C A F G L E T N S L D N P D S E F R                             |
| 481                                                                                   | CGAATGGGCAAAGCAATATTCAAGTTCAGATATCAGTCTTTAATACGAAGTGTGTGGACA        |
| 161                                                                                   | R M G K A I F K F R Y Q S L I R S V W T                             |
| 541                                                                                   | AGCATTCACCAACACTAATCAAGAGATTGAAATTGGATTTTATTGAAAAAAAGATTCAA         |
| 181                                                                                   | S I P P T L I K R L K L D F I E K K I Q                             |
| 601                                                                                   | GATTATTTTCATGGAAATTGTTGATGAAACTGTCCAGTATCGCGAAAAAAATAAAATATCC       |
| 201                                                                                   | D Y F M E I V D E T V Q Y R E K N K I S                             |
| 661                                                                                   | AGAAACGATTTTCTCGATTTACTCATCGCTTTAAAAAATAACACCATAATCGAAAAATTT        |
| 221                                                                                   | R N D F L D L L I A L K N N T I I E K F                             |
| 721                                                                                   | CAAGATACTGCTGAAACAGACGACCTAGAAAAATTTCTAGCTCAAGTAGGCGATAAACGC        |
| 241                                                                                   | Q D T A E T D D L E K F L A Q V G D K R                             |
| 781                                                                                   | ATCAAAAGTAACATAGATATGTCTAATGCGATGCTAGCAGCTCAATGTTTTGTTTTCTTC        |
| 261                                                                                   | I K S N I D M S N A M L A A Q C F V F F                             |
| 841                                                                                   | ATTGCTGGATTTGAGACCTCCTCCACCACGTTAGGATTTTTTATTACTAGAACTAGCGCAA       |
| 281                                                                                   | I A G F E T S S T T L G F L L L E L A Q                             |
| 901                                                                                   | AATGAAGAAATTCAAAACAAGGTACGCGATGAAATTCGAGCAGTTTTTGGAAAACAATGAT       |
| 301                                                                                   | N E E I Q N K V R D E I R A V L E N N D                             |
| 961                                                                                   | AATGAACTCACATACGATAGTATGAAACAAATGACTTACACGGATATGGCAATTGCAGAA        |
| 321                                                                                   | N E L T Y D S M K Q M T Y T D M A I A E                             |
| 1021                                                                                  | GCGCTCAGGAAATACCCCCCAGCAGGAATATTAATGAGAGAAGCGAATAAAAATTACAAA        |
| 341                                                                                   | A L R K Y P P A G I L M R E A N K N Y K                             |
| 1081                                                                                  | ATACCAAATACCAAATAATAATTCCTGCCAATACCGCCATTATAATTCCAGTCTTTGGA         |
| 361                                                                                   | I P N T K I I I P A N T A I I I P V F G                             |
| 1141                                                                                  | ATACACAGGGATGCGAAGTATTACGATAACCCTGAAGAATTTTCGTCCAGAAAGATT CACC      |
| 381                                                                                   | I H R D A K Y Y D N P E E F R P E R F T                             |
| 1201                                                                                  | GAGCGAGAAAAAGCCAAACGACCGCACTATACTTATCTACCATTTGGAGAAGGACCCAGA        |
| 401                                                                                   | E R E K A K R P H Y T Y L P F G E G P R                             |
| 1261                                                                                  | GTTTGCATAGCTGAACGATTTGCCAAAATGCAAGTCAA AATTGGATTAGTATACATGTTG       |
| 421                                                                                   | V C I A E R F A K M Q V K I G L V Y M L                             |
| 1321                                                                                  | AAAGACTTTTTCTTATCATCTTTTCGCCCAA AATGAAATTCCCATTGGAGTTTGAAAAAAT      |
| 441                                                                                   | K D F S Y H L S P K M K F P L E F E K N                             |
| 1381                                                                                  | TTCGGACTTTTGACCGTTCGTAATGGCATT TGGCTGCAAAGAACAAAGTTATAG             |
| 461                                                                                   | F G L L T V R N G I W L Q R T K L *                                 |

F. Nucleotide and deduced amino acid sequences of PsCYP6PZ5 from *P. solenopsis*

|      |                                                                 |
|------|-----------------------------------------------------------------|
| 1    | ATGTACATTTTTAGTGTATTTTTCTTATTCATTGTAACGGTG TTCCTGTACATCTATCAT   |
| 1    | M Y I F S V F F L F I V T V F L Y I Y H                         |
| 61   | GTATTCAGAAAATCTTACAAGTTCTTCGAAGATGCTGGAATACCGTACATCAAACCGCAA    |
| 21   | V F R K S Y K F F E D A G I P Y I K P Q                         |
| 121  | TGGATATTTGGCAATATGAAGGATGTACTATTATTCAGAAAATCCTTACTCGAAAGATAC    |
| 41   | W I F G N M K D V L L F R K S L L E R Y                         |
| 181  | CAAGAGTTATACCATCATTTTAGATCCTCATCCATACGCAGGAGTATTTCTAGCCCATAAG   |
| 61   | Q E L Y H H L D P H P Y A G V F L A H K                         |
| 241  | CCCTCTGTTATGATACGAGATCCCGACCTAATCAAAGCTGTTCTAGTTAAAGATTTTCGCA   |
| 81   | P S V M I R D P D L I K A V L V K D F A                         |
| 301  | TATTTTCATGATCGTATGATTGCTGGTATTTGCAAGAAAAC TGAACCAATAGCTAACCAA   |
| 101  | Y F H D R M I A G I C K K T E P I A N Q                         |
| 361  | ATATCCATGATGAAAGGAGACGAATGGCGGAACCTTCGTATCAAATTGACCAGTACATTC    |
| 121  | I S M M K G D E W R N L R I K L T S T F                         |
| 421  | AGCAGCGGAAAAAATGAAATTCATGTTTCCCACATTACTCAAGTGCTCCGAAGGCATTAAA   |
| 141  | S S G K M K F M F P T L L K C S E G I K                         |
| 481  | ACGGCGCTTGAAAAGGTATGCTCAGATTCTGAAGGATTCTGAAGTTAAAGATTTTATGTTCC  |
| 161  | T A L E K V C S D S E G F E V K D L C S                         |
| 541  | AGGTATACGACTGATGTAATAGGTAATTGCGCTTTTGGTATGGAAACACATTCCCTGGAA    |
| 181  | R Y T T D V I G N C A F G M E T H S L E                         |
| 601  | AATCCTGATTCCGAATTCAGAAAAATGGGAAAACGTGTATTATCGTTT TAGATGGCAAACA  |
| 201  | N P D S E F R K M G K R V L S F R W Q T                         |
| 661  | ATGCTACGCATGTTCTTTCCCAACATACCCAACAATTTTCATTAAAATCTTCGGATTACGA   |
| 221  | M L R M F F P N I P N N F I K I F G L R                         |
| 721  | TTTTTTGAGAGAGAAGTCAGCGAATATTTTCACAAATATCGTCAAAGATGCAGTGAAGCAC   |
| 241  | F F E R E V S E Y F T N I V K D A V K H                         |
| 781  | AGAGAACAGAATAACATAACCAGAGGTGATTTTCTAGATCTACTTATCGCTTTGAAAAAT    |
| 261  | R E Q N N I T R G D F L D L L I A L K N                         |
| 841  | AACACCGAATTGGAGAAATTAAAAAATCAAACGACGACAAAGACTTGATAAAATTCATG     |
| 281  | N T E L E K L K N Q N D D K D L I K F M                         |
| 901  | TCTCAAATTGGCGATAAGGTCATAAAAAGCAAAATAGATATGACTATTGAAACAATGACT    |
| 301  | S Q I G D K V I K S K I D M T I E T M T                         |
| 961  | GCCCAATCATTTTCTCTTTTTTCTTGGCTGGATTTGATCCAACCGCAACAACGCTTAGTTTC  |
| 321  | A Q S F L F F L A G F D P T A T T L S F                         |
| 1021 | CTTCTCTTCGAATTATCACAAAATCAACAAATTCAAGAAAAACTTCGACAAGAGATCATA    |
| 341  | L L F E L S Q N Q Q I Q E K L R Q E I I                         |
| 1081 | TCTACATTGGAAACTAATGATGGAATATTA ACTTACGCAATGCTCAAAAAAATGCCTTAC   |
| 361  | S T L E T N D G I L T Y A M L K K M P Y                         |
| 1141 | TTGGATATGGTTGTTGCGGAGACGTTAAGAAAATGGCCACTTGGGCTTATCATGCGTATA    |
| 381  | L D M V V A E T L R K W P L G L I M R I                         |
| 1201 | TGCAATCAA AATTACAAGATTCCTGATTCAAATGTAATCATCAAAGAAGGAACCGAAGTT   |
| 401  | C N Q N Y K I P D S N V I I K E G T E V                         |
| 1261 | ATCATTTCCGCGCAGGGTCTTCATTCTGATAAGAAATATTTT TGA AAAACCAGATGAATTT |
| 421  | I I S A Q G L H S D K K Y F E K P D E F                         |
| 1321 | TATCCGGAACATTTTACCGAAGAAGCAAAGGCAGCTAGACCTCATTACGCCTATTTACCT    |
| 441  | Y P E H F T E E A K A A R P H Y A Y L P                         |
| 1381 | TTCGGAGAGGGTCCTCGAAATTGTATAGCTGAACGATTTGCTAAAATGATGGTTAAAGTT    |
| 461  | F G E G P R N C I A E R F A K M M V K V                         |
| 1441 | GGAACAATCTACTTCCTCAAAGATTTTTTCTTTTGTATTATCACCAAAAACCAAATTACCA   |
| 481  | G T I Y F L K D F S F V L S P K T K L P                         |
| 1501 | TTGGATATATTACCTTCATTTGGTAATATTGCAGTAAAAAATGGAATCTGGCTGAAATGC    |
| 501  | L D I L P S F G N I A V K N G I W L K C                         |
| 1561 | GAACTTATACATAGATAG                                              |
| 521  | E L I H R *                                                     |

G. Nucleotide and deduced amino acid sequences of PsCYP3635A2 from *P. solenopsis*

|      |                                                                 |
|------|-----------------------------------------------------------------|
| 1    | ATGTATTTTTCTGTATGCCTGTGTTTGGTAATATGCATCTTGTACTTATGGCTCCGATAT    |
| 1    | M Y F S V C L C L V I C I L Y L W L R Y                         |
| 61   | AAACTAAGCTACTGGGAGAGACGTGGAGCTCCTTCTTTACCCGTCAATTTCTTCAGCAGC    |
| 21   | K L S Y W E R R G A P S L P V N F F S S                         |
| 121  | GAATTAAAATGGTTGGTAATGAAACAATCGCGATTCCAATACTTCAAGGATATCTACGAC    |
| 41   | E L K W L V M K Q S R F Q Y F K D I Y D                         |
| 181  | CAATTGGCACCAATAAATATGGCGGATACAGCGTAATGCCACTTAAAATGATGGTACGA     |
| 61   | Q L A P H K Y G G Y S V M P L K M M V R                         |
| 241  | GATCCTGAAATCATTAATTCGTGCTGACCAAGGAATTCGAGAGTTTTTTCCAGTCGCGAG    |
| 81   | D P E I I K F V L T K E F E S F S S R E                         |
| 301  | AAACTATTCTTCACTAAGAGCGATCCGTTGACTCATTTTATTTTAAATTTAGAAGGCAAC    |
| 101  | K L F F T K S D P L T H F I F N L E G N                         |
| 361  | GAATGGAAAGATAACCAGAGCTCGATTGACTCCTGGATTTAGTTCGGGTAAATTGAAATAT   |
| 121  | E W K D T R A R L T P G F S S G K L K Y                         |
| 421  | ATGTTTGATTTGATCGCCGAATGTGCAGACGAGATGGATAAAAGTTTGCATATCAACGAG    |
| 141  | M F D L I A E C A D E M D K S L H I N E                         |
| 481  | GATAGGCAACTCGTCGACGTATGCAAGGTACTGAGATTGTACGTTATGAACGTAATTTTC    |
| 161  | D R Q L V D V C K V L R L Y V M N V I F                         |
| 541  | ACCTGCACGTACGGATTGAAAGTGAATTCCATGAAAAATGGTTGCGATATATTTTTTAAAA   |
| 181  | T C T Y G L K V N S M K N G C D I F L K                         |
| 601  | ATGGCTGGTTTAATTCGTGGTGATAATGAAATTAATAGAAAATTGGCGAATTTTTTCTTTT   |
| 201  | M A G L I R G D N E I N R K L A N F S F                         |
| 661  | ATATTTCCATCCGCCATAAGACACTATATTAGGCCTTCTACTTTTGGCGAGTACTCGAGA    |
| 221  | I F P S A I R H Y I R P S T F G E Y S R                         |
| 721  | GATTTCTTCAAGGGCATTATCATGGATTCCATCAAATACAGAGAGGAAAATGATATAAAG    |
| 241  | D F F K G I I M D S I K Y R E E N D I K                         |
| 781  | AGGAATGATTTCTTGCAGATTTTCATGACCTTGATGAAGGCTGAAGATGAATTCAAGTGG    |
| 261  | R N D F L Q I F M T L M K A E D E F K W                         |
| 841  | ACCATAGACAAAACATTAGCTCACGGTATTCTCTACATCATGGCTGGTTTCTCAACCACC    |
| 281  | T I D K T L A H G I L Y I M A G F S T T                         |
| 901  | ACCAGCGCTGTCAGTTTCCTCCTATATGAAATGGCCAAACACCCAGATATGCAAAAAAAAA   |
| 301  | T S A V S F L L Y E M A K H P D M Q K K                         |
| 961  | GTCCACAAAGAACTGGATGAAATAATGGAAGAGTTCGATGGCACCTTAAATTACGAATGC    |
| 321  | V H K E L D E I M E E F D G T L N Y E C                         |
| 1021 | GTTTCTAATACGAACTACTTGAATAAAGTTATATCAGAAACCATGAGAAAATACAGCGTT    |
| 341  | V S N T N Y L N K V I S E T M R K Y S V                         |
| 1081 | ATATCTTCATTTTCCCGACGCTGCACCAGCACATGTACGCTCCCAGATGGTTTTGTGTCGTC  |
| 361  | I S S F S R R C T S T C T L P D G F V V                         |
| 1141 | GAGAAAGGCACCGCCGTTGTGGTTTCAGTTAGCGGACTTCATCACGATCCAGCTTATTAC    |
| 381  | E K G T A V V V S V S G L H H D P A Y Y                         |
| 1201 | CCAGATCCGTTGAAATTCGATCCAGAACGTTTTAATGAGGAAAATAAGAACGCTAGACAT    |
| 401  | P D P L K F D P E R F N E E N K N A R H                         |
| 1261 | CCGTACTGTTTTTCTGCCTTTTCGGAGCTGGTCCGAGATATTGCATAGGCGAACGATTTTTCG |
| 421  | P Y C F L P F G A G P R Y C I G E R F S                         |
| 1321 | ATGCTGATGATAAAAGCGGCAACATTCACAATTCTGAAGAAATTTTCCGTTTCTGTGTTA    |
| 441  | M L M I K A A T F T I L K K F S V S V L                         |
| 1381 | CCGGAACATGAAATAGAGTTTGATTTTATGCCTAATAAGCTGACCACTGAAGTACCAAGT    |
| 461  | P E H E I E F D F M P N K L T T E V P S                         |
| 1441 | ATCAAGTTACAATTCATCATAGGCAACGTACTACAGATATTCAATGA                 |
| 481  | I K L Q F T H R Q R T T D I Q *                                 |

H. Nucleotide and deduced amino acid sequences of PsCYP15A1 from *P. solenopsis*

|      |                                                               |                                  |
|------|---------------------------------------------------------------|----------------------------------|
| 1    | ATGATGTTGAAGTTGAATAGAATAAAATATGTATTTTCATTACAAC                | TACTCCACTAATGCT                  |
| 1    | <u>M</u> M L K L N R I K Y V F H Y N Y S T N A                |                                  |
| 61   | AAGCCGTTTGAAGAAATACCTTCGCCAAAAGGTTTACCATTTGTTGGTACGTTATTTTCT  |                                  |
| 21   | K P F E E I P S P K G L P F V G T L F S                       |                                  |
| 121  | TTTATCGCTGCCGGAGGAAGTACACAAC                                  | TCCATGAATATATTGATAAAAGGCATCAACAA |
| 41   | F I A A G G S T Q L H E Y I D K R H Q Q                       |                                  |
| 181  | CTTGGAATAATTTTTCAAGAGAAATTAGGACCTATTTTCGAGCGTGTTTTTAAATGATGCT |                                  |
| 61   | L G I I F Q E K L G P I S S V F L N D A                       |                                  |
| 241  | CATGAAATACGAAAAGTATTCGTTGGTGAAGGTAAATATCCGAAACACGTTCTTCCTGAC  |                                  |
| 81   | H E I R K V F V G E G K Y P K H V L P D                       |                                  |
| 301  | TGCTGGCTTTTGTACAATAAAATAAAGGGATATCAGAGAGGTTTATATTTTCATGGATGGA |                                  |
| 101  | C W L L Y N K I K G Y Q R G L Y F M D G                       |                                  |
| 361  | GAAGAATGGTTTATGTACCGCAGGTTGTTAAATGATAAACTTTTAAAACATGATTACTAC  |                                  |
| 121  | E E W F M Y R R L L N D K L L K H D Y Y                       |                                  |
| 421  | GGACATGGAATACAGAACGATTATCTTCTACAAAAGACATTTGAAATATGGCTTCAA     | AAAT                             |
| 141  | G H G I Q N D Y L L Q K T F E I W L Q N                       |                                  |
| 481  | TCTAAATACGGTGAAATAATTGATTTAGAAAATCAGTTATACTACCTCTCTATTATATTT  |                                  |
| 161  | S K Y G E I I D L E N Q L Y Y L S I I F                       |                                  |
| 541  | ATGATGTCTTTTACTCTTGGACGTTCTTTTTCACGATAATGTCGATAAATTTTTACCCAAT |                                  |
| 181  | M M S F T L G R S F H D N V D K F L P N                       |                                  |
| 601  | GTTGAAAAGTTAGCATTGGTGGTGAAAGACATCTTTAAATGGAGTGTA              | AAACTATCAATT                     |
| 201  | V E K L A L V V K D I F K W S V K L S I                       |                                  |
| 661  | CTGCCAGCGACTTTGGCCAGTAGTTTAAATTTACCTGTTTGGAATAATTTTGTC        | ACTGCA                           |
| 221  | L P A T L A S S L N L P V W N N F V T A                       |                                  |
| 721  | GTTGACGAATCTATTAAACTTACCACAGATCTATTAGAAGGAGCTGAACTAAAGGCTAGT  |                                  |
| 241  | V D E S I K L T T D L L E G A E L K A S                       |                                  |
| 781  | GATGGAATTCTCTATTTTTTTATTAGACCAAACAT                           | TCCAATAGATGTAGCGCAACGAATA        |
| 261  | D G I L Y F L L D Q N I P I D V A Q R I                       |                                  |
| 841  | ATTGTGGATTTTTTTGTTGGCTGCTGGAGATACGACTGCTTTGGCTACCCTTTGGATATTG |                                  |
| 281  | I V D F L L A A G D T T A L A T L W I L                       |                                  |
| 901  | TATTTGTTAGGAAGGCATAAAAATATTCAAGACGAGTTATATAGTGATATTCA         | AAAAAAT                          |
| 301  | Y L L G R H K N I Q D E L Y S D I Q K N                       |                                  |
| 961  | CGTGATAGTCATGAAACTCGATTATTGCGGAACATAATTAAAGAATCCATGAGATTGTAT  |                                  |
| 321  | R D S H E T R L L R N I I K E S M R L Y                       |                                  |
| 1021 | CCGATCGCACCGTTCATTGCTCGCTATTTGCCACAGGAAACAGAAATAGCTTCCTACCTT  |                                  |
| 341  | P I A P F I A R Y L P Q E T E I A S Y L                       |                                  |
| 1081 | ATTCCAGCTAACCATTTAATCAGCATATCGGTCTTCAACTGTAGCAGAAATGAAAAATAT  |                                  |
| 361  | I P A N H L I S I S V F N C S R N E K Y                       |                                  |
| 1141 | TTCCCTAAAGCGAATAAATTTGAACCAAAAAGGTGGGATCGTTTGGCAAATGGAAAATAC  |                                  |
| 381  | F P K A N K F E P K R W D R L A N G K Y                       |                                  |
| 1201 | GCTGAAGTCAATGATCCATATGCTACTTTGCCGTATGGGATGGGAGCACGATCTTGTATT  |                                  |
| 401  | A E V N D P Y A T L P Y G M G A R S C I                       |                                  |
| 1261 | GGCAGGAATTTGTCTAAAGTACAAATCAGTATCATCATAAACAAATTAATTGCTTCGTAT  |                                  |
| 421  | G R N L S K V Q I S I I I N K L I A S Y                       |                                  |
| 1321 | GAACTTGAAGTTCGAAATGAGGTTGGAGTGAAATTAAACATGGTTACAAC            | TCTCACAA                         |
| 441  | E L E V R N E V G V K L N M V T T P S Q                       |                                  |
| 1381 | CCCATCAAAC                                                    | TATTCTTGAAAAAAGATGA              |
| 461  | P I K L F L K K R *                                           |                                  |

I. Nucleotide and deduced amino acid sequences of PsCYP4NT1 from P. solenopsis

|      |                                                                |
|------|----------------------------------------------------------------|
| 1    | ATGCAATTTACTTTGTACGAATATTCGATTTCTTATTCCGCCGCTATGTCGGTGTTTTTG   |
| 1    | M Q F T L Y E Y S I S Y S A A M S V F L                        |
| 61   | ATTTTTATTTTAACGCTTCTCGTTTCATTGCTTTGTAAACGACGTATGCAATTTTACGA    |
| 21   | I F I L T L L V S L L C K R R M Q F L R                        |
| 121  | TATTTTGAAACAATACCAGGTCCAAGTGCTATACCGATTTTAGGAAATGCTTTACAATA    |
| 41   | Y F E T I P G P S A I P I L G N A L Q L                        |
| 181  | ACTGGATCTCAAGCAGAATTCTTCAAGCTTGTACGACAATATGCTGAAAAATACAAAAAT   |
| 61   | T G S Q A E F F K L V R Q Y A E K Y K N                        |
| 241  | ATGTTTGTATTATGGATCGGACAAAGACCTTTCGTGTTTTTTGAACAAGGCGGAAGTTATT  |
| 81   | M F V L W I G Q R P F V F L N K A E V I                        |
| 301  | CAGCCCTTACTGAATTCTAGCGTGCATATTGAAAAAAGTTTGGAATACAAACTTCTAGAT   |
| 101  | Q P L L N S S V H I E K S L E Y K L L D                        |
| 361  | CCTTTCCTTGGCACCGGATTAGTGACTAGTGCAGGACAAAAATGGCATTACAAAGAAAA    |
| 121  | P F L G T G L V T S A G Q K W H S Q R K                        |
| 421  | CTTTTGACGCCAGTATTTCACTACAATATGCTTGAAAATTATCTCCACACTGTACTAAAA   |
| 141  | L L T P V F H Y N M L E N Y L H T V L K                        |
| 481  | GAAAGCGAAGTTTTAGTCCAGCAACTTCAAAAAGAAGTGGATCACCCATTTAACATCGTG   |
| 161  | E S E V L V Q Q L Q K E V D H P F N I V                        |
| 541  | CCCTACATGAAATTAGCAGCTATGGACATAATCTGCGAGCTAACACTAGGATACCAGCTT   |
| 181  | P Y M K L A A M D I I C E L T L G Y Q L                        |
| 601  | CATTCCCAAATCAACGCTAATCTGGAATACGTTTCATGCTATTGAAGATTTAATGGCTATT  |
| 201  | H S Q I N A N L E Y V H A I E D L M A I                        |
| 661  | GCACAAAGGCGATTCATCACTCCATGGCTAAAACCAAATTTCTTGTTCAACTGCACACCA   |
| 221  | A Q R R F I T P W L K P N F L F N C T P                        |
| 721  | TATGCTGCTAGGCAGAAAAAATGTTTGGACATAGTTAATACGTTTTTCAACCAAATTATC   |
| 241  | Y A A R Q K K C L D I V N T F S T K I I                        |
| 781  | GAAAAGAAAAAAGAAGAGTACCAAATTCGCAAAAAAACAAAGTTGCGTTGGATGTCAAT    |
| 261  | E K K K E E Y Q N S Q K N K V A L D V N                        |
| 841  | TCCAATATTTTACAAAAAAAAAAGGAAAAGTGTTTTTTAGACTTATTGTTAGAACTTTTCG  |
| 281  | S N I L Q K K K G K V F L D L L L E L S                        |
| 901  | GAAAACGGATCGATTCTCACCGATGATGATATAAGAGAAGAAGTGAACACATTCATATTT   |
| 301  | E N G S I L T D D D I R E E V N T F I F                        |
| 961  | GCCGGTCACGATACTACATCGATAACTGTTTCTTGGAGTCTTTACCTGTTGGGATTTTCAT  |
| 321  | A G H D T T S I T V S W S L Y L L G F H                        |
| 1021 | CCAGAAGCTCAAGAGAAAATTTTAAAAGAATTAAATGAAAAAATACCGGATTTTCGGAAGT  |
| 341  | P E A Q E K I L K E L N E K I P D F G S                        |
| 1081 | TCTTCATTAAAAACATCAGATATTGGTAGTCTGGAATATTTGGAATGCTGTATCAAAGAA   |
| 361  | S S L K T S D I G S L E Y L E C C I K E                        |
| 1141 | GTCTTAAGACTATATCCTCCAGTTCCTTTAATAGCAAGACATATAACTTCACCATTAGAA   |
| 381  | V L R L Y P P V P L I A R H I T S P L E                        |
| 1201 | ACGATGAATCAGATAATACCACCAGGAACTAGCGCATTAATCAATGTATACTCCTTACAT   |
| 401  | T M N Q I I P P G T S A L I N V Y S L H                        |
| 1261 | AGAGATCCACAAAACCTTTCCTAATCCTTCTGAGTTCATTCCCGAAAGGTTTTTCAGCAGGA |
| 421  | R D P Q N F P N P S E F I P E R F S A G                        |
| 1321 | CAGTCAGTTGAAAAGAATCCATTTTGTATATTCCATTTAGCGCTGGCCCGCGAAACTGT    |
| 441  | Q S V E K N P F C Y I P F S A G P R N C                        |
| 1381 | ATCGGGCAAAAATTAGCCATTCAAAGCGTCAAGATAATTTTAGCAAATATTATCAAGAAT   |
| 461  | I G Q K L A I Q S V K I I L A N I I K N                        |
| 1441 | TACAAAATTAAGACAATGCAGAAAGAAAAAGATTTGAGATTAATTTCCGAAGTAGTTTTA   |
| 481  | Y K I K T M Q K E K D L R L I S E V V L                        |
| 1501 | ACCAACGAAGGTGGAATTAACATTACCATCGAGAAAAGATGA                     |
| 501  | T N E G G I N I T I E K R *                                    |

J. Nucleotide and deduced amino acid sequences of PsCYP4G219 from P. solenopsis

|      |                                                                |
|------|----------------------------------------------------------------|
| 1    | ATGGCAGTATCATTAGAGACAGTCAATGTTTTAAGATTATTCTCATCCACAACAACCTTC   |
| 1    | M A V S L E T V N V L R L F S S T T T F                        |
| 61   | TTCTACCTCTTAATAACCGGCGCTGACGCTATGGTACATTTATTTTAGAATCAGTAAAAAG  |
| 21   | F Y L L I P A L T L W Y I Y F R I S K K                        |
| 121  | AGATTTTACGAATTACTATCGAAAATCGACGGTCCGTCCGGATTACCGCTTTTGGGAAAC   |
| 41   | R F Y E L L S K I D G P S G L P L L G N                        |
| 181  | GCTTTAGAATTCATCGGCGATCCGCATACTACTTTTAAAATTCTTTACGAGAGGAGTTTC   |
| 61   | A L E F I G D P H T T F K I L Y E R S F                        |
| 241  | GAATTCGAATTCGGAAAACCGATTAAAGATTTGGATTGGACCAAGAGTGGTGGTGTTCCTTG |
| 81   | E F E F G K P I K I W I G P R V V V F L                        |
| 301  | ACGGATCCCAGAGATGTTGAAGTTATTTTAAGCAGCCACGTGCACATAGACAAATCGCCA   |
| 101  | T D P R D V E V I L S S H V H I D K S P                        |
| 361  | GAATACAGGCTCTTCGAACCTTGGCTCGGAGATGGTCTGTTGATCAGTACCGGTGAAAAA   |
| 121  | E Y R L F E P W L G D G L L I S T G E K                        |
| 421  | TGGAGAGCGCACAGAAAACCTGATCGCTCCTACTTTCCACTTGAATGTGCTGAAATCATTC  |
| 141  | W R A H R K L I A P T F H L N V L K S F                        |
| 481  | ATCAGCATTTTCAACAAGAACAGCAGAGCTATTGTAGAAAAAATGAGGAAACTTGGTGAC   |
| 161  | I S I F N K N S R A I V E K M R K L G D                        |
| 541  | AGAGAATTCGACGTGCACGAATATATGGGAGAAGCGACGGTAGAAATTTTACTCGAAACT   |
| 181  | R E F D V H E Y M G E A T V E I L L E T                        |
| 601  | GCGATGGGAGTTGATAAGAAAACCTCAGGATAGGGAAGCCAGCGAATATGTTATATCAGTC  |
| 201  | A M G V D K K T Q D R E A S E Y V I S V                        |
| 661  | ATGAAGATGTGCGATATCTTACATTTGAGACATAGACAAATCTGGTTCAGACCTGAAGTC   |
| 221  | M K M C D I L H L R H R Q I W F R P E V                        |
| 721  | ATTTTCCAGTTCACCAAATACGCTAAAGCTCAAGAAAGATTTTTGAGCATCATTCACGGT   |
| 241  | I F Q F T K Y A K A Q E R F L S I I H G                        |
| 781  | TTGACCAACAAAGTCCTCCAAGTCAAAAAATCCGAATACGAGAAGAGGAAAAAGGAATTA   |
| 261  | L T N K V L Q V K K S E Y E K R K K E L                        |
| 841  | CTCGACCATGAACCCGAATTCAACATTCAAGATAAATCGGAAGACTTAAAAACCGAAAAA   |
| 281  | L D H E P E F N I Q D K S E D L K T E K                        |
| 901  | GCCGAAGTCAAAGTCGAAGAAATCAAATCGAACAAACCCGAAGAAACGGTTATCGGACAC   |
| 301  | A E V K V E E I K S N K P E E T V I G H                        |
| 961  | TCATACGGCCAAGCAGCTGGATTAAAGGATGATCTCGATGTAGACGATGATATCGGTGAA   |
| 321  | S Y G Q A A G L K D D L D V D D D I G E                        |
| 1021 | AAGAAACGTCCAGCTTTCTTAGACTTGTTAATTGAAAGCGCCGAAAATGGCGTCGTCTTA   |
| 341  | K K R P A F L D L L I E S A E N G V V L                        |
| 1081 | ACTGATAAAGAAGTCAGAGAACAAGTCGATACCATCATGTTCGAGGGACACGATACGACA   |
| 361  | T D K E V R E Q V D T I M F E G H D T T                        |
| 1141 | GCCGCTGGAAGCAGTTTCTTCTTGTGTTTAATGGGTACTCGCCCTGATATCCAGGAAAAA   |
| 381  | A A G S S F F L C L M G T R P D I Q E K                        |
| 1201 | GTAGTGGAGGAATTGAACACCATTTTCAAAGGCTCTGATCGTCCGTGTACTTTCCAAGAT   |
| 401  | V V E E L N T I F K G S D R P C T F Q D                        |
| 1261 | ACCTTGAGATGAAATATTTGGAACGTTGTATTATGGAAACTCTTCGTATGTACCCCCCG    |
| 421  | T L E M K Y L E R C I M E T L R M Y P P                        |
| 1321 | GTGCCAATGATTGCACGTCAGATCAAAGAGGATATTGTATTACCATCCACCAACGCCATT   |
| 441  | V P M I A R Q I K E D I V L P S T N A I                        |
| 1381 | GTACCGGCTGGCTGCACCATCGTAATTGGAACGTTCAAGTTACACCGTAACCCAACCGTA   |
| 461  | V P A G C T I V I G T F K L H R N P T V                        |
| 1441 | TACCCAAATCCGGACGAATACAACCCCGACAACCTTCCTACCGGAGAAATCAGCAAACCGT  |
| 481  | Y P N P D E Y N P D N F L P E K S A N R                        |
| 1501 | CACTACTACGCTTACGTTCCATTTCAGCGCTGGACCTCGTAGCTGCGTTGGACGTAAATAC  |
| 501  | H Y Y A Y V P F S A G P R S C V G R K Y                        |
| 1561 | GCCATGTTGAAATTGAAAATCTTACTTTCCACCATCTTACGTAATTTCCACGTTTCGCGCT  |
| 521  | A M L K L K I L L S T I L R N F H V R A                        |
| 1621 | TCGAAAAACCAAACCGAATGGCAATTACAAGCGGATATCATTTTGAACGAACTGATGGT    |
| 541  | S K N Q T E W Q L Q A D I I L K R T D G                        |
| 1681 | TTAGAATCACTTTGGAGCCGAGAAAGAAGACTAAATTGGTGGCATAA                |
| 561  | F R I T L E P R K K T K L V A *                                |

**K. Nucleotide and deduced amino acid sequences of PsCYP305A22 from *P. solenopsis***

|      |                                                                |
|------|----------------------------------------------------------------|
| 1    | GACGCAACTTTTCACTGCCTATGTTTTAAAGGAATACAAAACACCCACAGTTTTCAGTCATG |
| 1    | D A T F T A Y V L K E Y K T P T V S V M                        |
| 61   | TCGCTTTTTTATTATTGCTTGCATTTTTCATCATCACAGTTTATATTTGATCTCAACCGTG  |
| 21   | S L F I I A C I F I I T V L Y L I S T V                        |
| 121  | ATAAAGCCATCAAATTATCCTCCAGGTCCCAGTCGATTACCTATTGTTGGGAACACGTTT   |
| 41   | I K P S N Y P P G P S R L P I V G N T F                        |
| 181  | TTGATCAAGAAATTAAGCAAAGAATTAGGTGGTCAATTCAAAGCTCTTTTGAAGCTGCAT   |
| 61   | L I K K L S K E L G G Q F K A L L K L H                        |
| 241  | GAAGATTACAAGTCAAATATTATAGGATTGAAATTAGGCGGTGATCAATATGTTGTGGTT   |
| 81   | E D Y K S N I I G L K L G G D Q Y V V V                        |
| 301  | TTTGGACGTAAATTGGTGCAACAGGTGTTTACCAAGGATGAATTCCAAGGCAGACCAGAT   |
| 101  | F G R K L V Q Q V F T K D E F Q G R P D                        |
| 361  | GGTTTCTTTATTTCGGTTAAGAACCATGGGTACCAAAAAAGGAATTACCATGACTGATGGT  |
| 121  | G F F I R L R T M G T K K G I T M T D G                        |
| 421  | AAATTATGGCACGAACAAAGAAATTTTCGCTGAAAGACAGCTCAGACAAGTCTCGGC      |
| 141  | K L W H E Q R N F A E R Q L R Q L G F G                        |
| 481  | AAATTAGTTACCGAAAATCTCATCAAAGATGAGCTAAACAAATTATTGAATTCTTTCGGA   |
| 161  | K L V T E N L I K D E L N K L L N S F G                        |
| 541  | GAAAAACAAGAAGACATTTTCGCTTAATCAAAAACCTTTCATCAGCCTTCTTGAACGTATTG |
| 181  | E K Q E D I S L N Q K L S S A F L N V L                        |
| 601  | TGGACAATCACTGGGGGCAAGCAGTTCTCGAAAGATGACGATAAATTACCAGCGTTGCTT   |
| 201  | W T I T G G K Q F S K D D D K L P A L L                        |
| 661  | AATTTATTACGCGAACGTAGCAAGGCTTTTGATATGGCTGGTGGGTATTGAATCAACTA    |
| 221  | N L L R E R S K A F D M A G G L L N Q L                        |
| 721  | CCGTGGTTGAGATTTATCGCTCCTGATTATTGTGGTTATACCTGTATTCAAAGATTGAAT   |
| 241  | P W L R F I A P D Y C G Y T C I Q R L N                        |
| 781  | TCGAAATTATACGAGTTGTTCCAAGAAATCATTGACGAACACAAAAGAAGTATTACCAAC   |
| 261  | S K L Y E L F Q E I I D E H K R T I T N                        |
| 841  | GAGACTAGGGATTTTGTGTTGATGCTTATTTACACGAAAAAGAATCTGCTAATCCAGACACC |
| 281  | E T R D F V D A Y L H E K E S A N P D T                        |
| 901  | AGCACATTCACCGATGATCAGCTAGTCGCCATATGTCTAGATTTCTTCATTGCTGGAGCT   |
| 301  | S T F T D D Q L V A I C L D F F I A G A                        |
| 961  | CTTACCCTAGTTATACTTTTAGATTTTGCAGTCTTAGCCACCGTCAGCCATCCGCATGTG   |
| 321  | L T T S Y T L D F A V L A T V S H P H V                        |
| 1021 | CAACAAAACTTCACGAAGAAATCGACAAAGTATTAAAGCGTAAACAAATGCCATCGATT    |
| 341  | Q Q K L H E E I D K V L K R K Q M P S I                        |
| 1081 | GAAGACAAATTCAAATTACCGTATGTCGAAGCGTTGCTCCTTGAATCACAGAGATTTCAA   |
| 361  | E D K F K L P Y V E A L L L E S Q R F Q                        |
| 1141 | CACGTTGTACCAACTGCTGGTCCAAGAAGAGTGTTGAAAGATACTACTTTAGATGGATAC   |
| 381  | H V V P T A G P R R V L K D T T L D G Y                        |
| 1201 | CGTATTCCAAAGGATAACAATCGTTTTAATGAGTTTGAGATCGATTCACTACGACCAGCAA  |
| 401  | R I P K D T I V L M S L R S I H Y D Q Q                        |
| 1261 | AGATGGAGTGACCCAGAGGTATTCAGACCAGAAAGATTTCTCACTGAAGATGGACAACCT   |
| 421  | R W S D P E V F R P E R F L T E D G Q L                        |
| 1321 | ATCCCTGATGAAGGCTTATGTACATTTGGGTTAGGAAAAAGACGATGCCCTGGTGAAATT   |
| 441  | I P D E G L C T F G L G K R R C P G E I                        |
| 1381 | CTAGCGAAAAGTTTCTTATTTTATGGCGTTTACCGCGTTATTCAACCATTATAAAATCACA  |
| 461  | L A K S F L F M A F T A L F N H Y K I T                        |
| 1441 | TTTCCACCTGGTAAAGAGCCTTCATCTAAAATACCAGCGGCTGGAATATTACTAACGCCT   |
| 481  | F P P G K E P S S K I P A A G I L L T P                        |
| 1501 | CAACCTTACTCGGTAAATTTGCAAGCTCGTGGTGATTATGATTTGTGA               |
| 501  | Q P Y S V N L Q A R G D Y D L *                                |
